# Supplementary material for: Heterologous Production of 1-Tuberculosinyladenosine in Mycobacterium kansasii Models Pathoevolution towards the Transcellular Lifestyle of Mycobacterium tuberculosis
Source: PubMed Central journal article supplement (PMC7587436; doi:10.1128/mbio.02645-20), 2020-10-20

7H9 pH 6.6

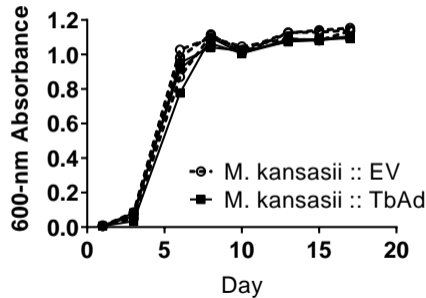

7H9 pH 5.4

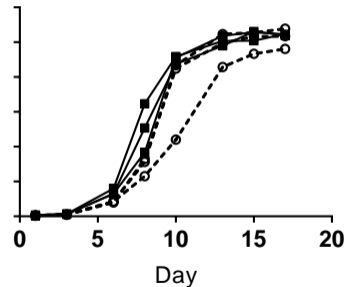

7H9 pH 5.2

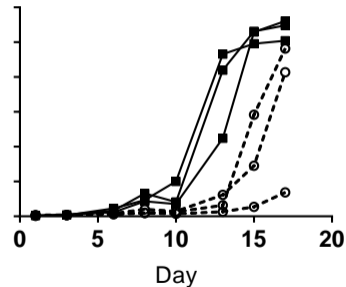

7H9 pH 5.1

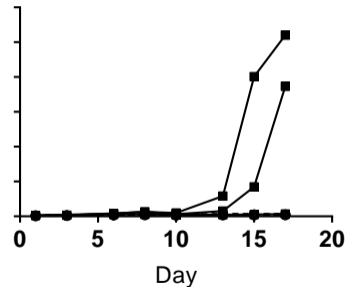

7H9 pH 5.0

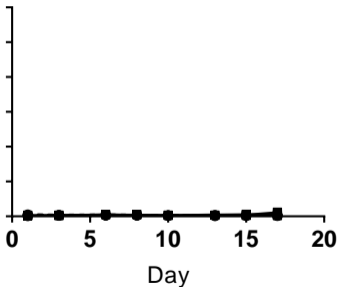

Supplement: mBio.02645-20-sf001.pdf [file mBio.02645-20-sf001.pdf]
