# Supplementary material for: Heterologous Production of 1-Tuberculosinyladenosine in Mycobacterium kansasii Models Pathoevolution towards the Transcellular Lifestyle of Mycobacterium tuberculosis
Source: PubMed Central journal article supplement (PMC7587436; doi:10.1128/mbio.02645-20), 2020-10-20

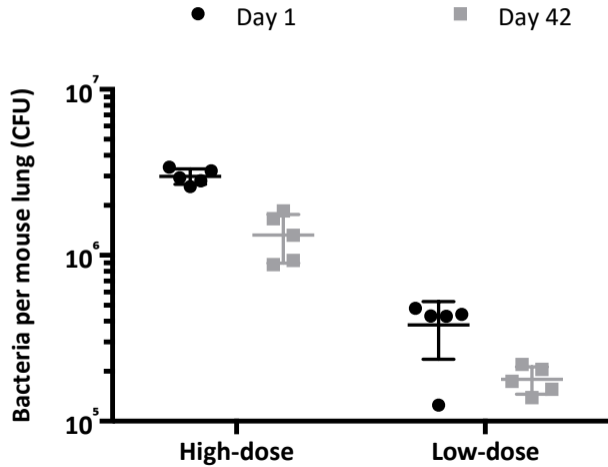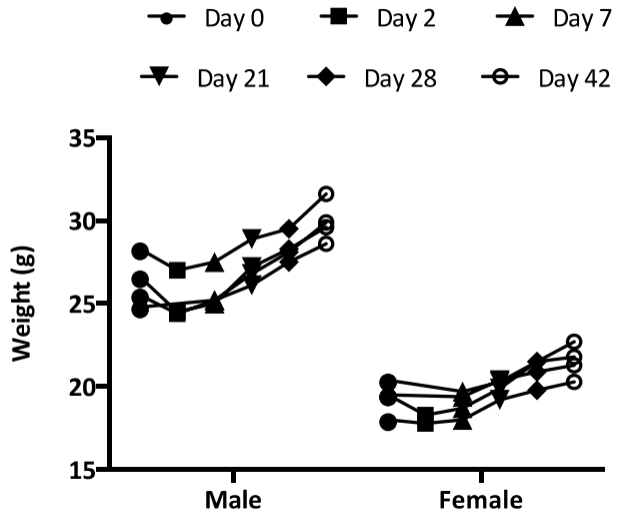

Supplement: mBio.02645-20-sf006.pdf [file mBio.02645-20-sf006.pdf]
